# Supplementary material
Source: PubMed Central journal article supplement (PMC3694440)
Supplement: NIHMS328621-supplement-01.pdf [file NIHMS328621-supplement-01.pdf]

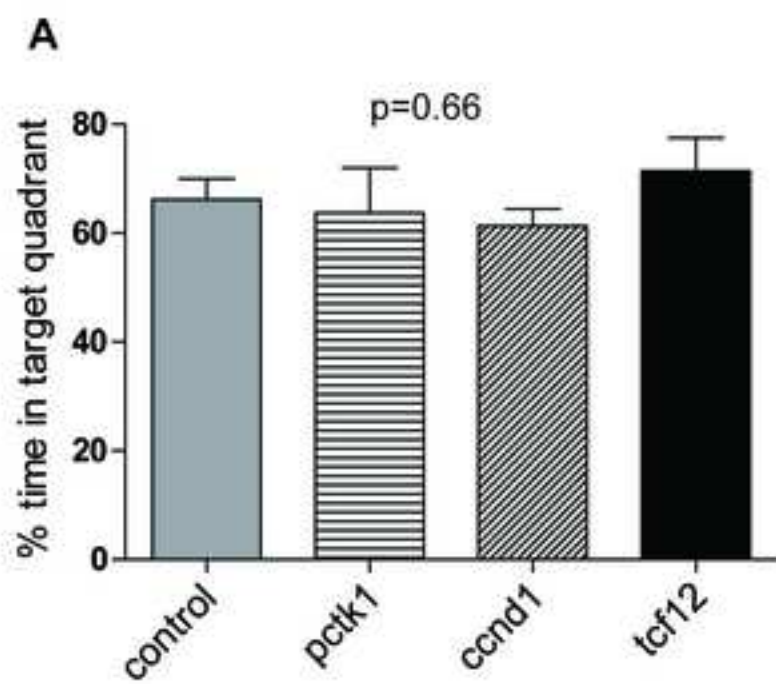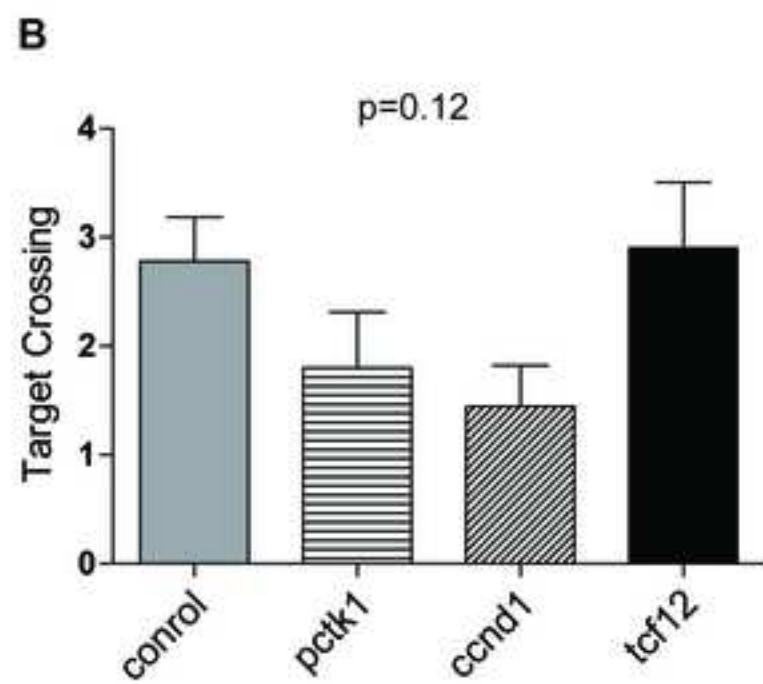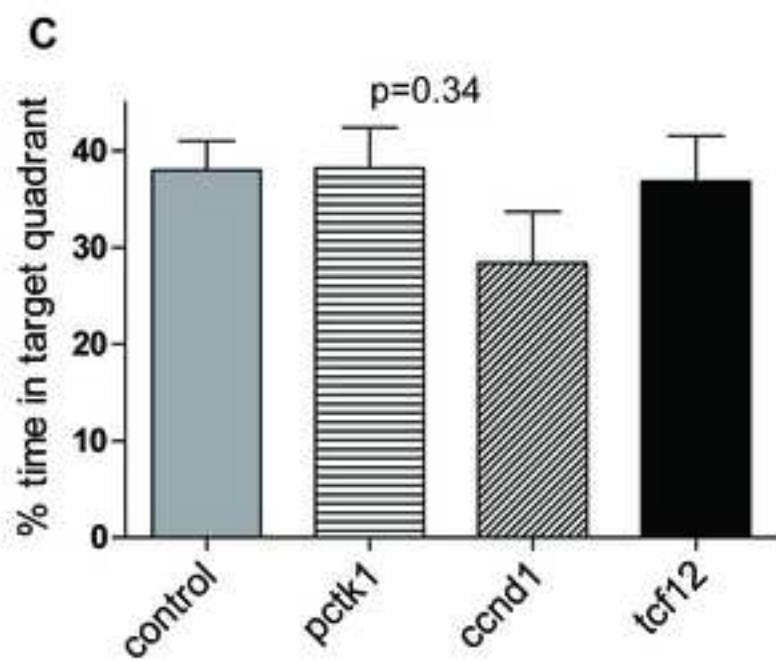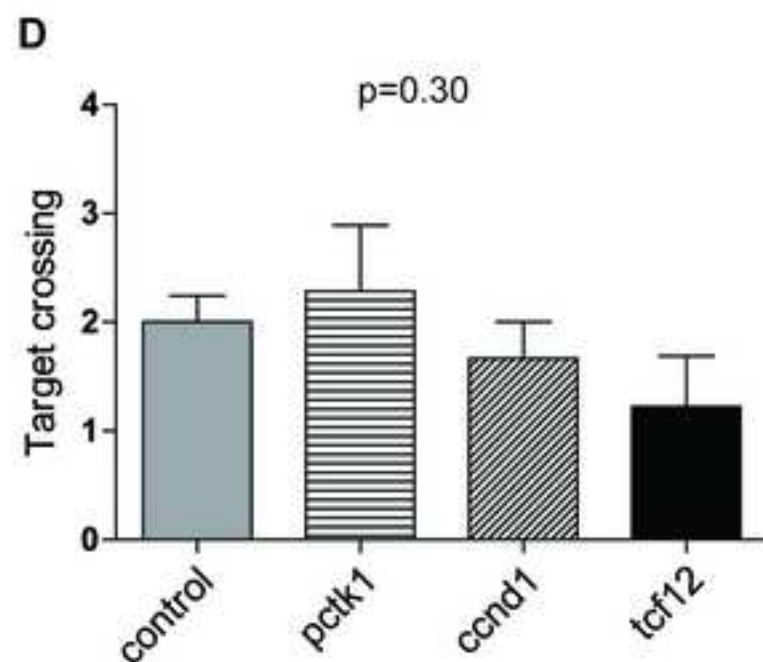

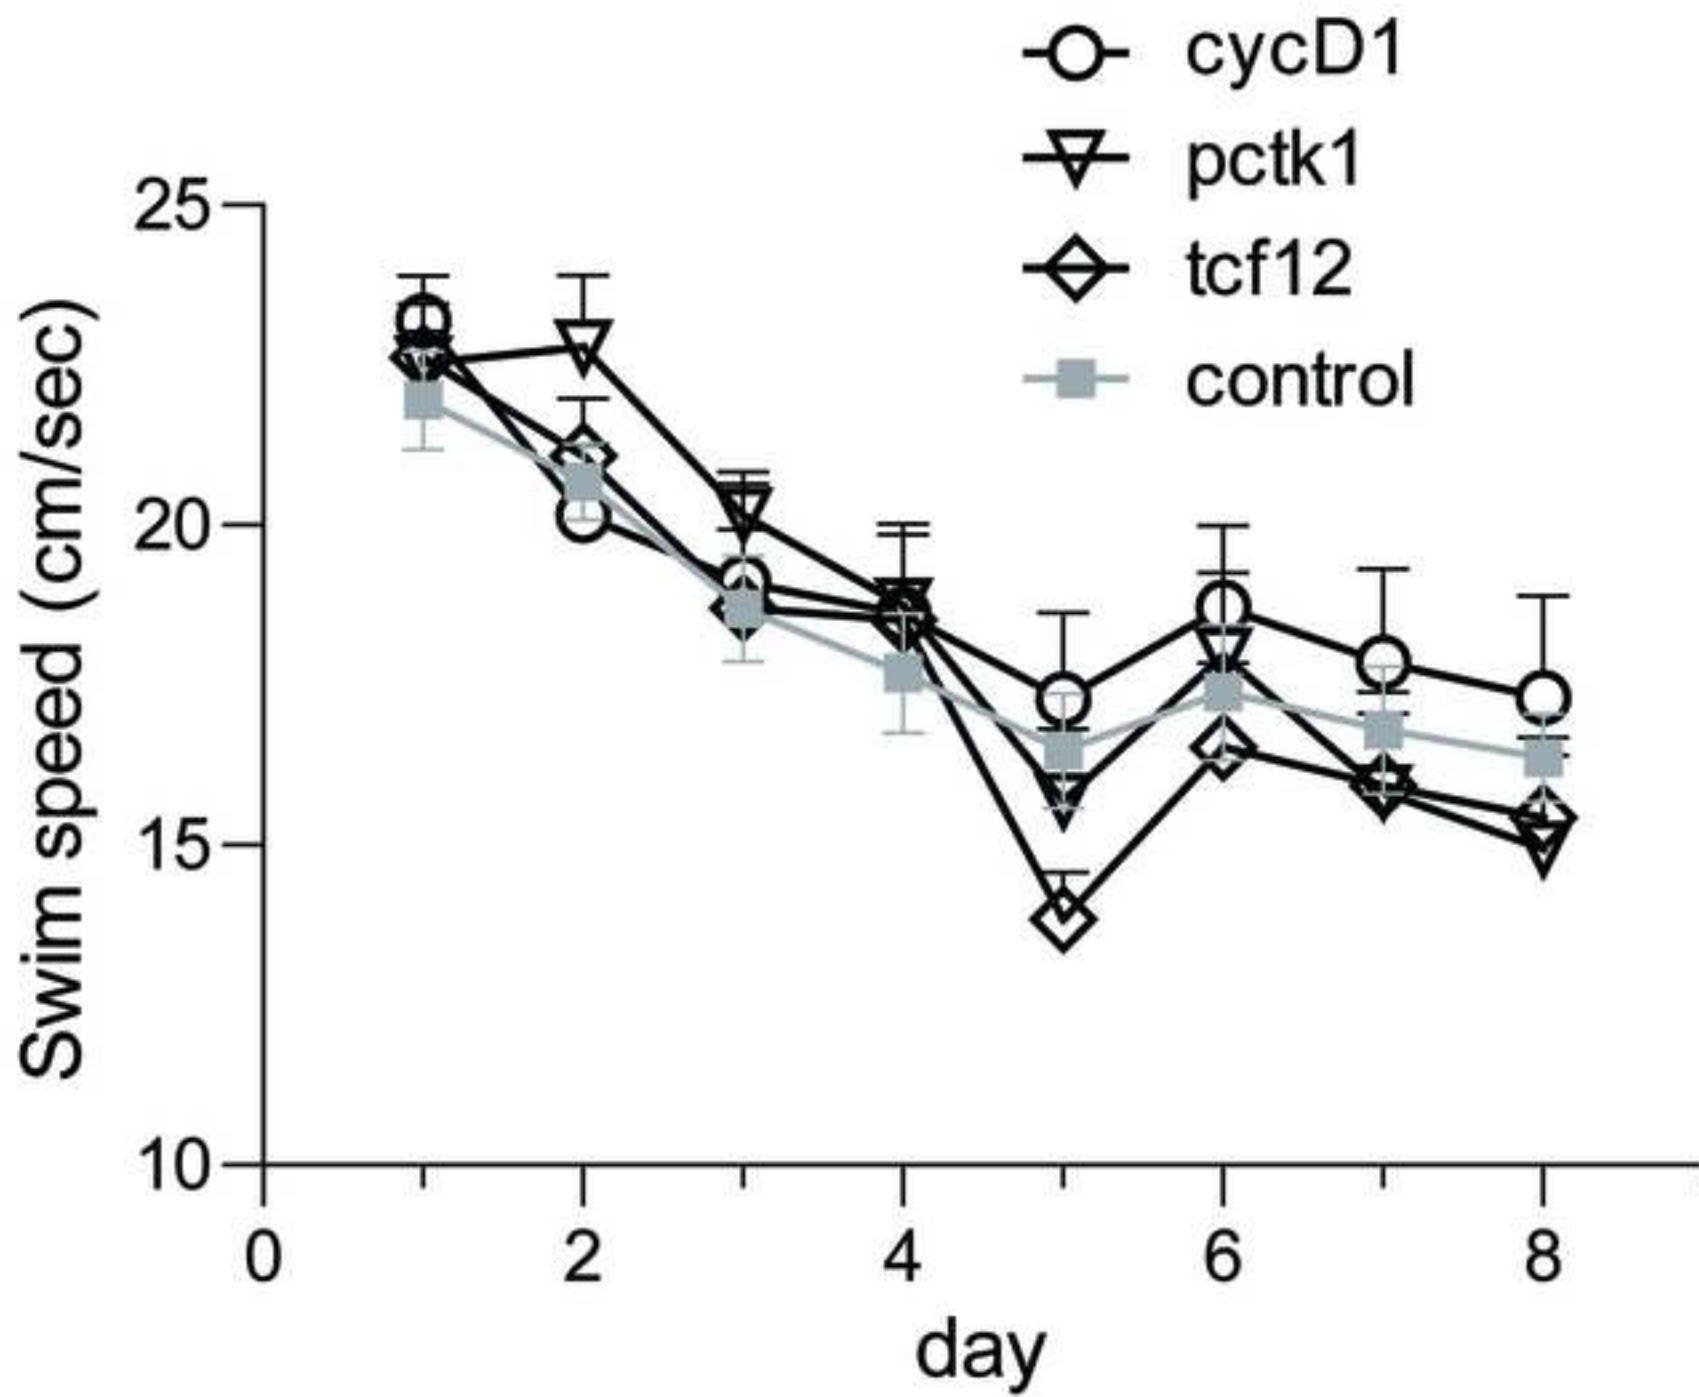

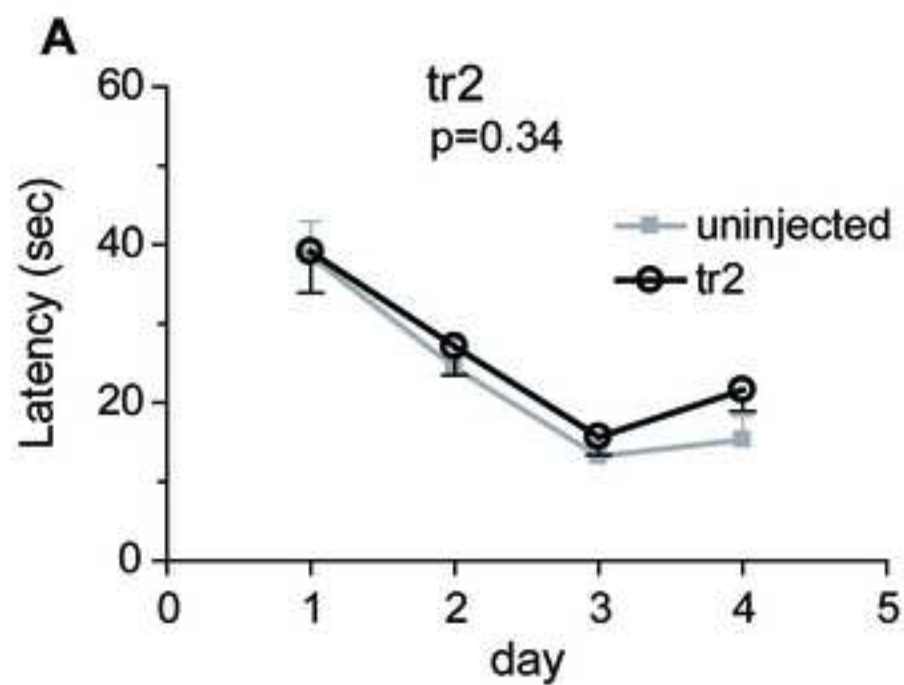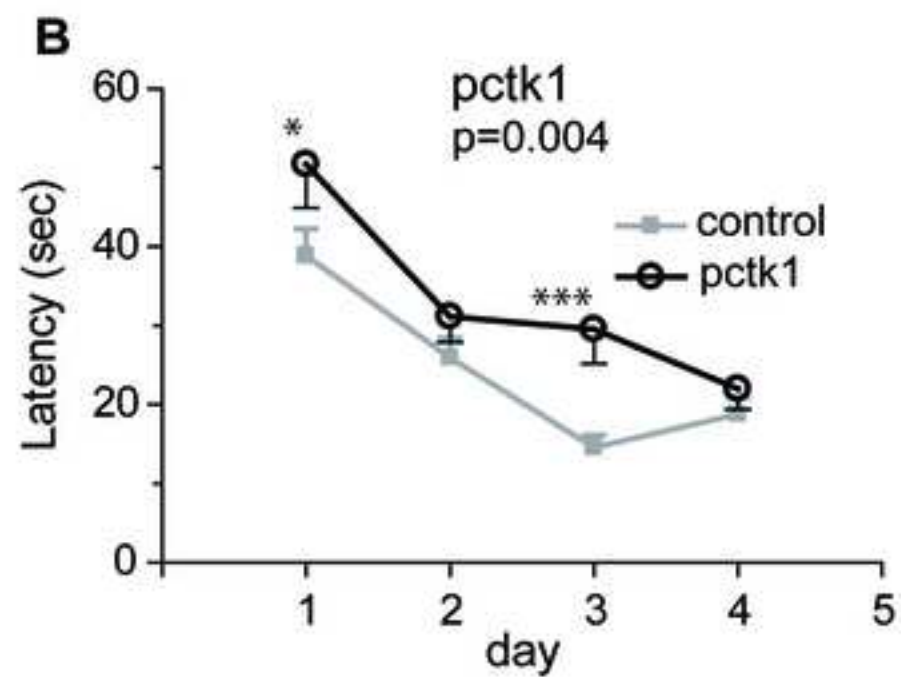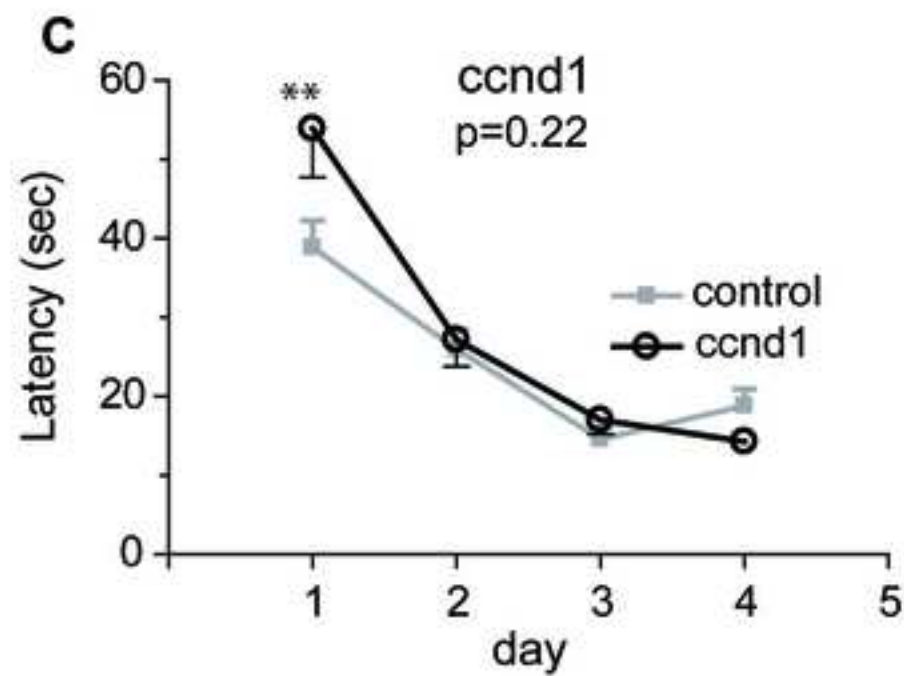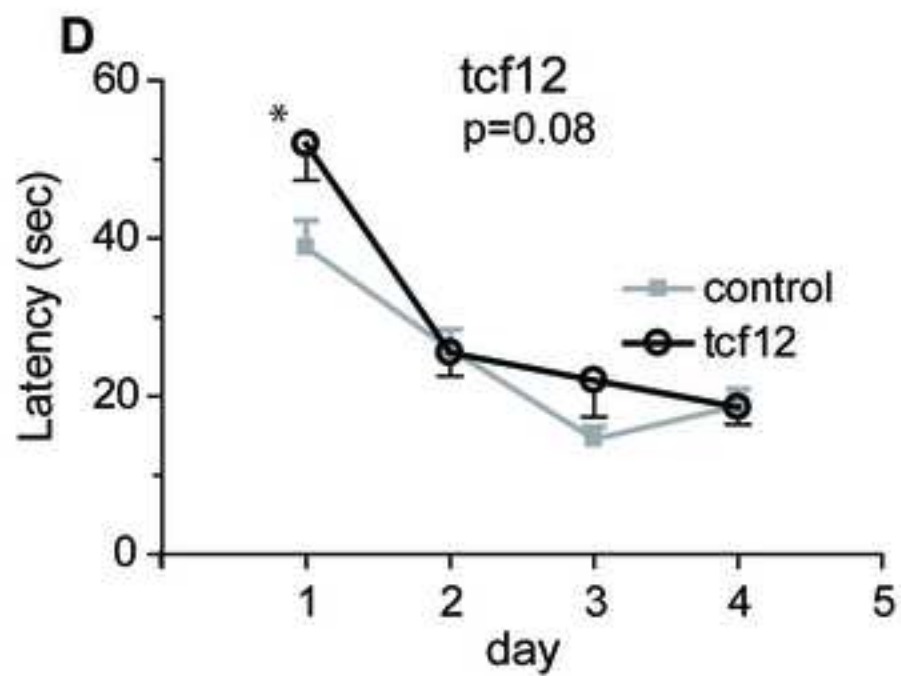

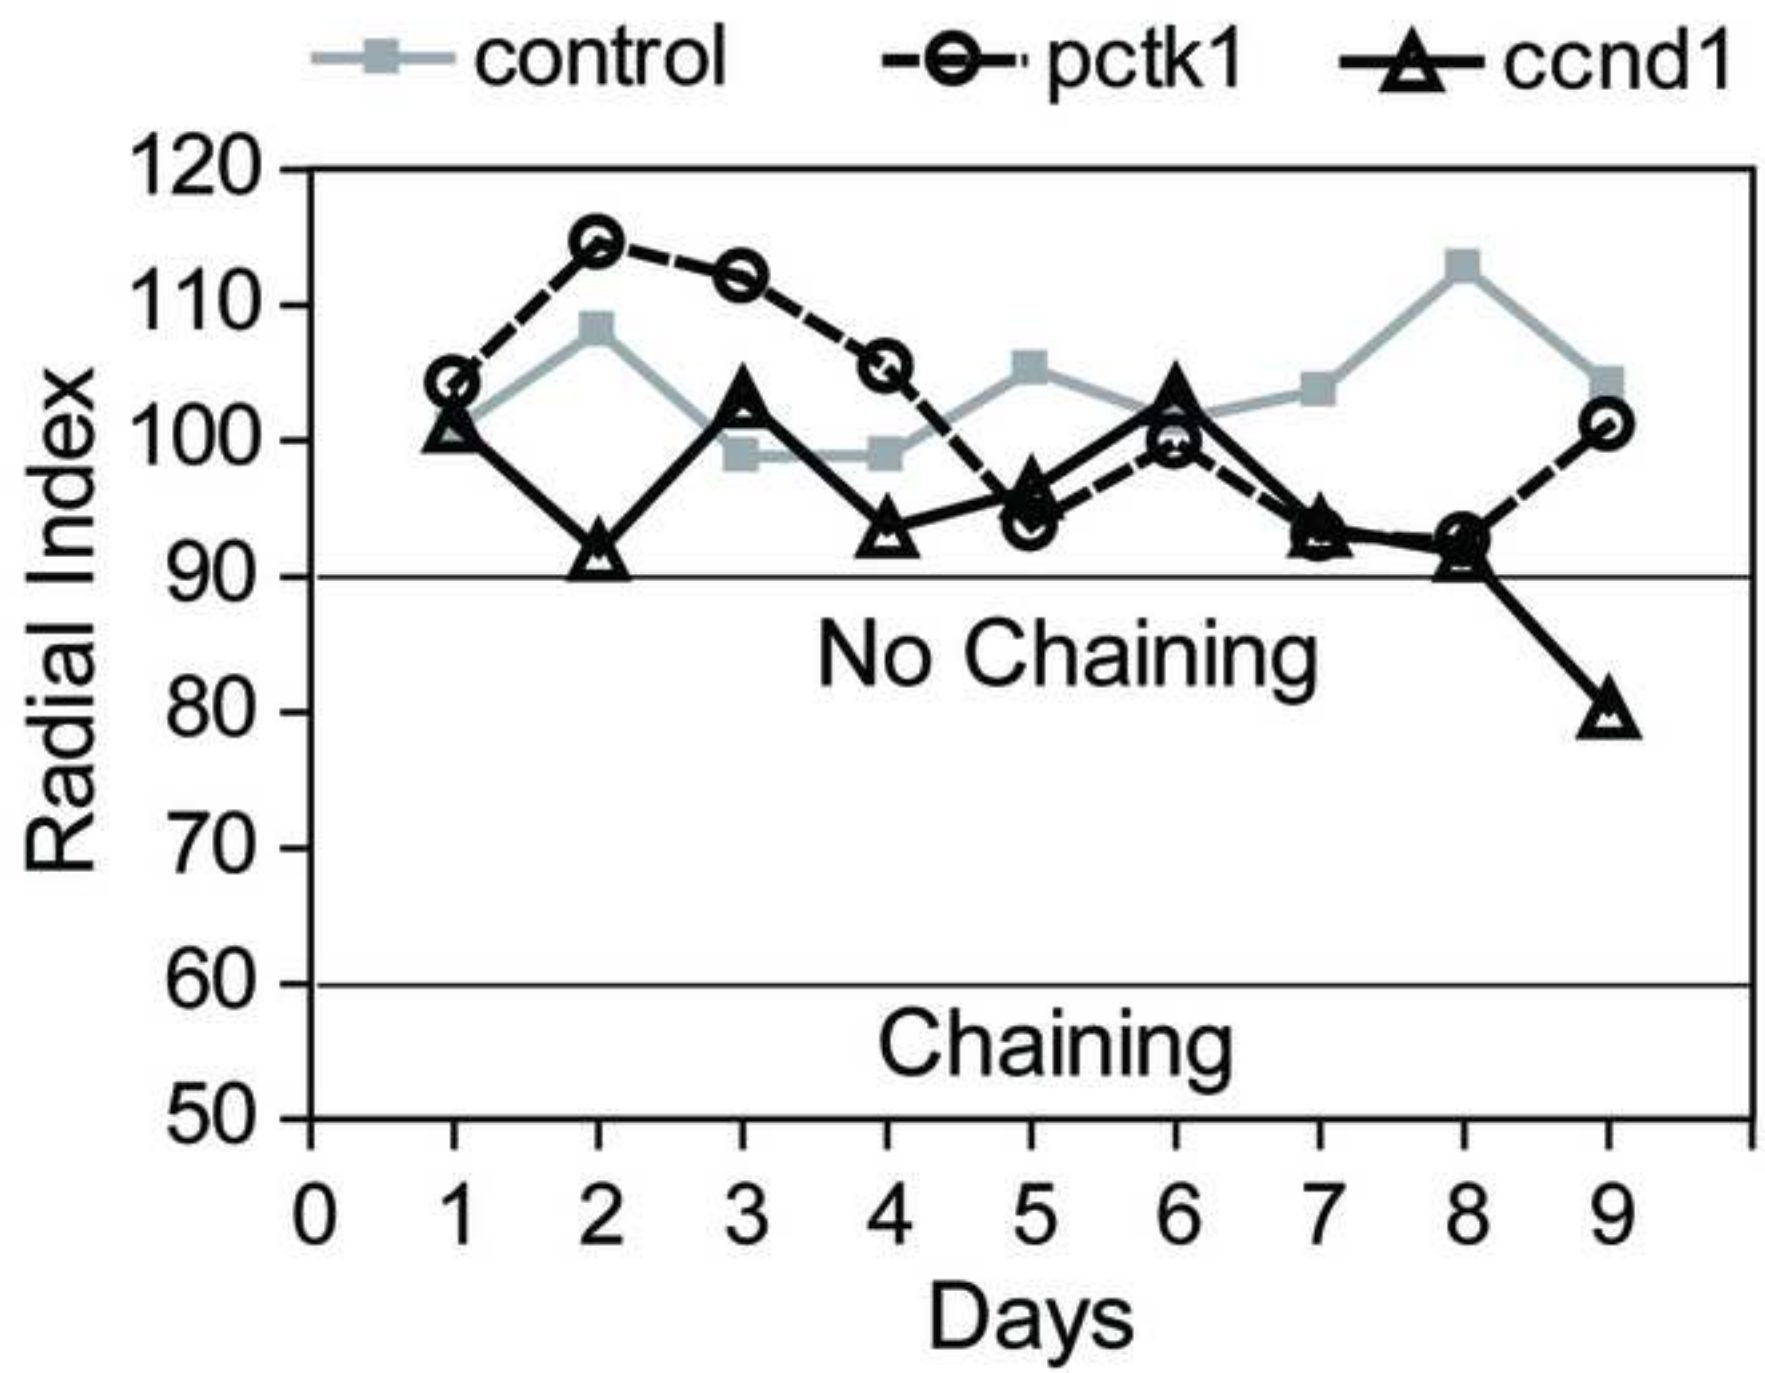

control

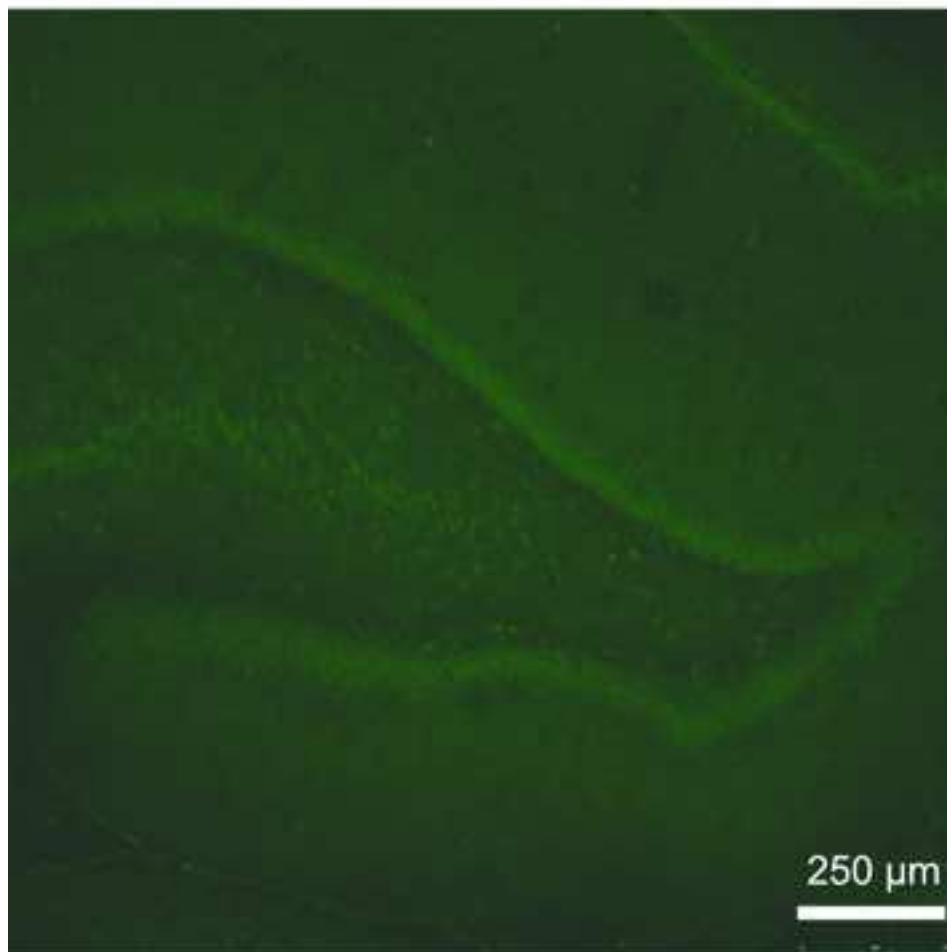

pctk1

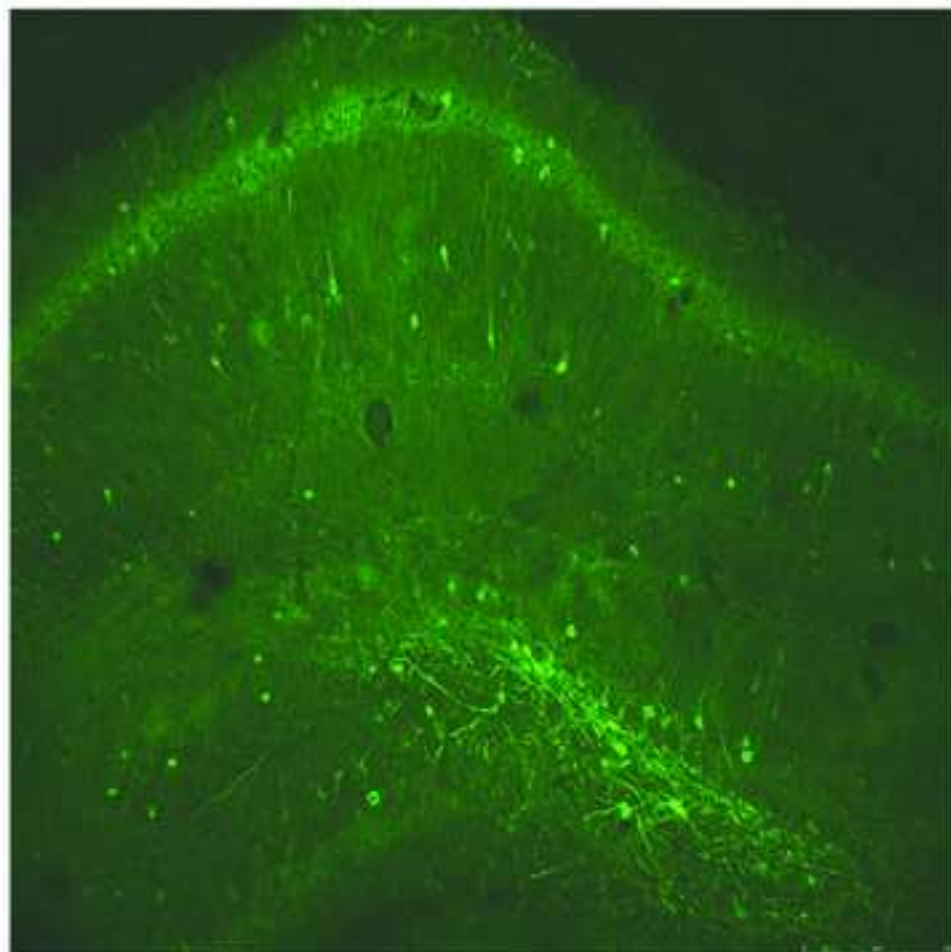

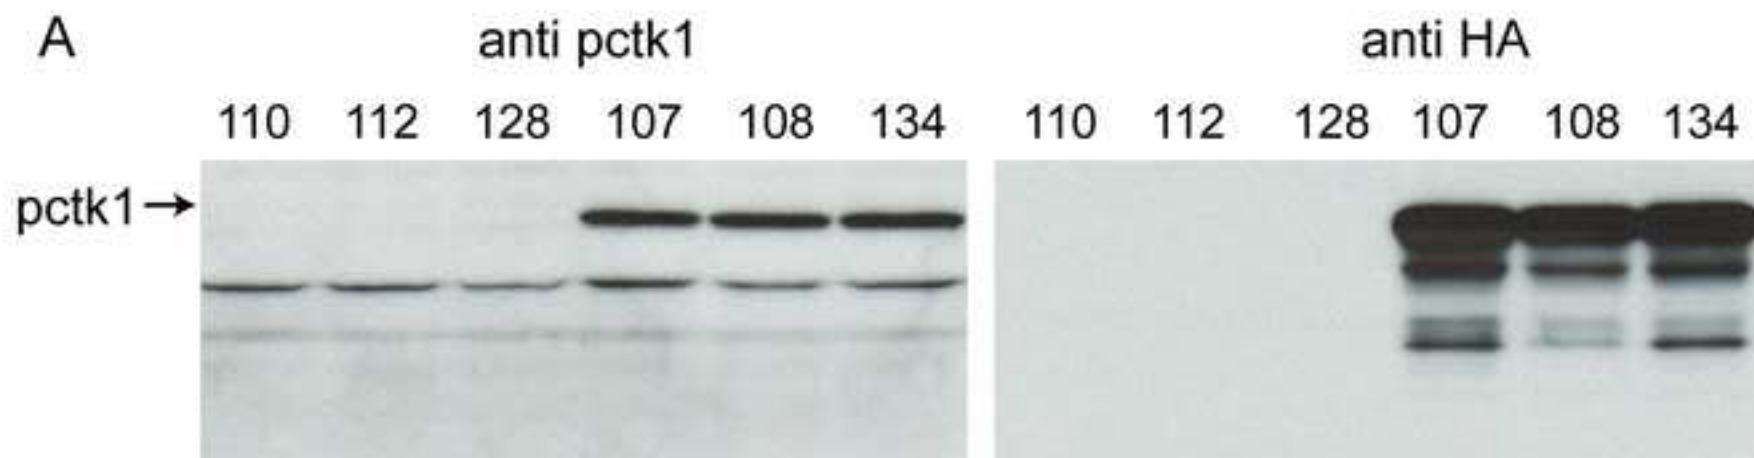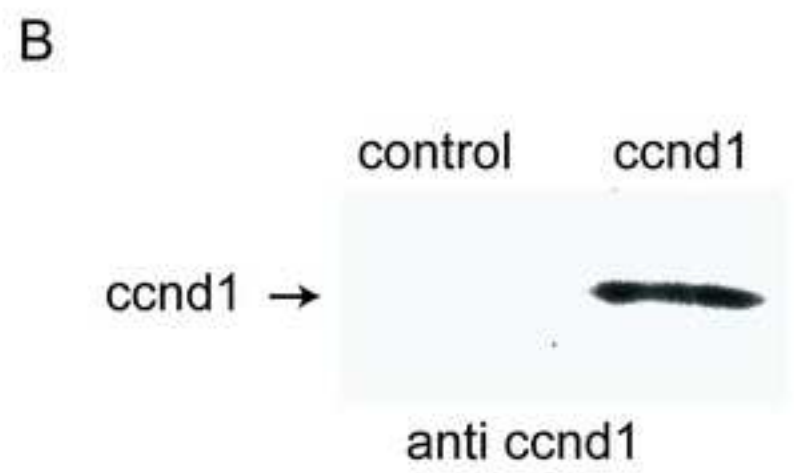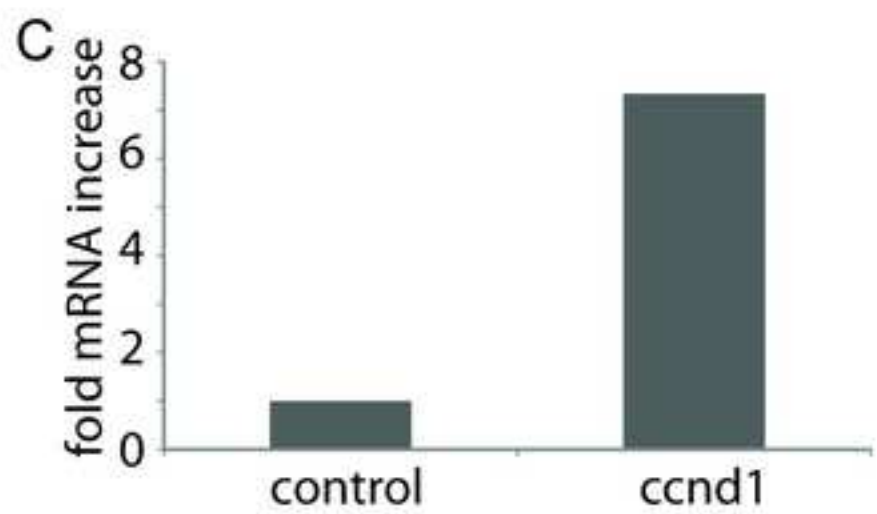

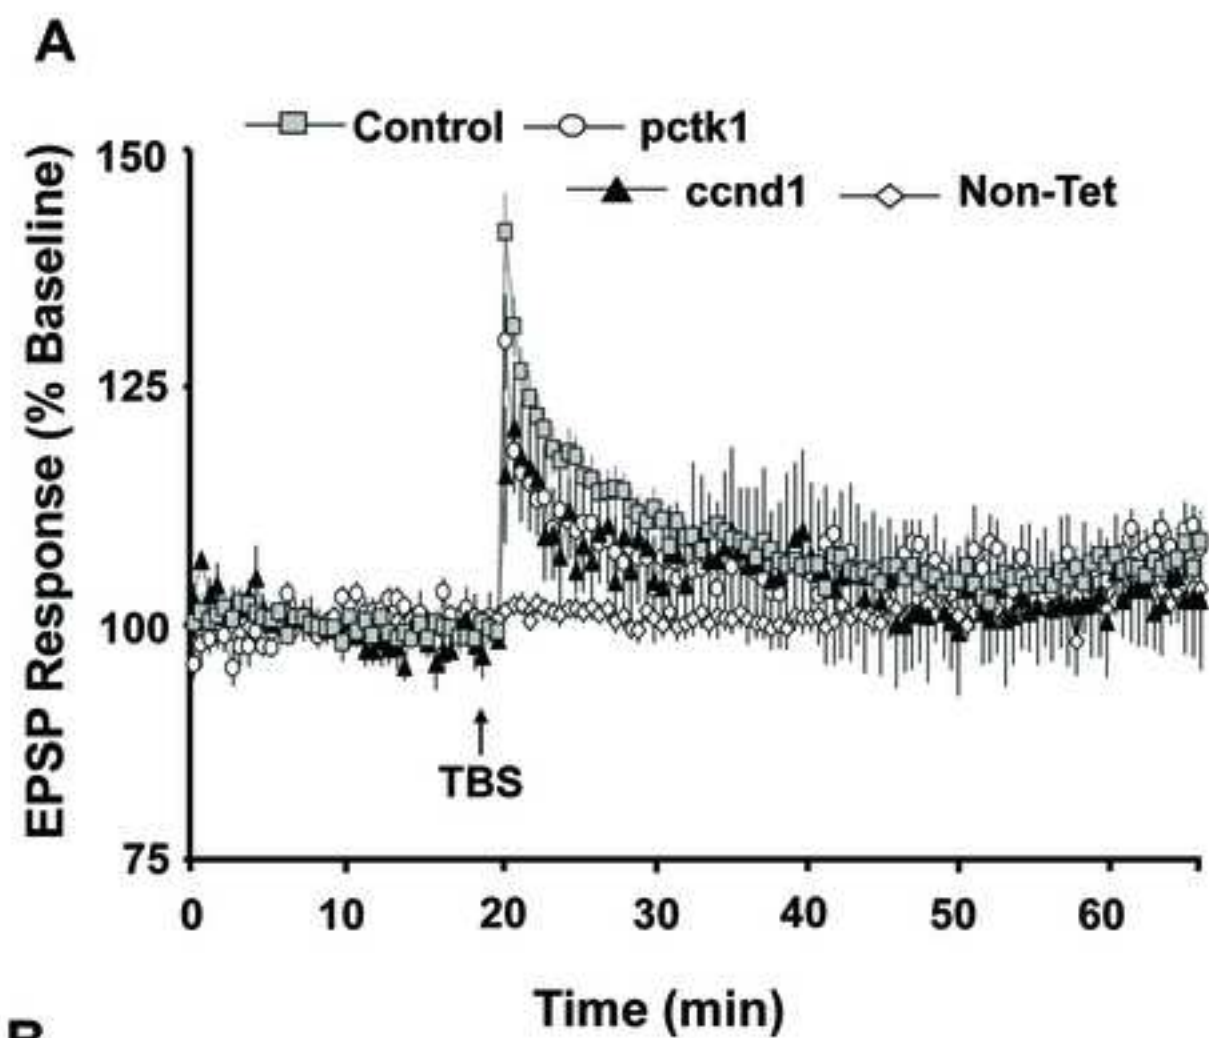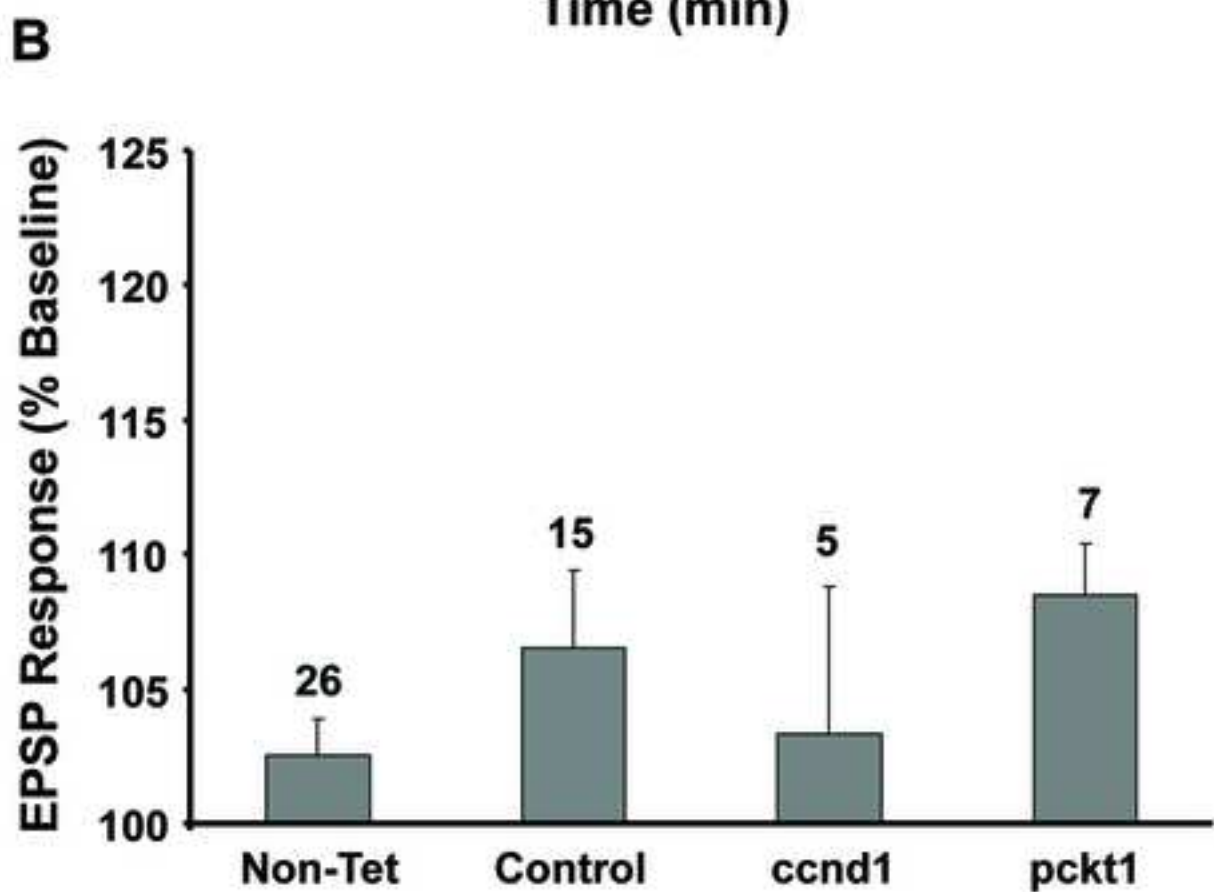

Supplementary Table 1: *P* values for two way repeated ANOVA comparisons of experimental treatment groups with each control group for main effect of gene expressed\*

| Experimental Treatment | Control Treatment | MWM Latency | Reverse MWM Latency | RAWM Reference Memory | RAWM Working Memory |
|------------------------|-------------------|-------------|---------------------|-----------------------|---------------------|
| pctk1                  | uninjected        | 0.0307      | 0.005               | 0.4981                | 0.043               |
| pctk1                  | tr2               | 0.0481      | 0.0475              | 0.8534                | 0.0087              |
| pctk1                  | tr2+uninjected    | 0.0441      | 0.004               | 0.6376                | 0.0031              |
| ccnd1                  | uninjected        | 0.0572      | 0.12                | 0.0166                | 0.005               |
| ccnd1                  | tr2               | 0.1896      | 0.54                | 0.0377                | 0.0001              |
| ccnd1                  | tr2+uninjected    | 0.0540      | 0.2186              | 0.0093                | <0.0001             |
| tcf12                  | uninjected        | 0.0555      | 0.0538              | 0.0389                | 0.0487              |
| tcf12                  | tr2               | 0.2307      | 0.30                | 0.0230                | 0.0118              |
| tcf12                  | tr2+uninjected    | 0.0656      | 0.0796              | 0.0187                | 0.0039              |

\*Shaded boxes:  $p < 0.05$
